# Supplementary material
Source: ML conference proceedings conference paper supplement (https://openaccess.thecvf.com/content/CVPR2024/html/Jiang_EVS-assisted_Joint_Deblurring_CVPR_2024_paper.html)
Supplement: Supplementary file [file Jiang_EVS-assisted_Joint_Deblurring_CVPR_2024_supplemental.pdf]

# Supplementary Material for “EVS-assisted joint Deblurring, Rolling-Shutter Correction and Video Frame Interpolation through Sensor Inverse Modeling”

Rui Jiang\*, Fangwen Tu\*, Yixuan Long, Aabhaas Vaish, Bowen Zhou, Qinyi Wang  
Wei Zhang, Yuntan Fang, Luis Eduardo Garcia Capel, Bo Mu, Tiejun Dai, Andreas Suess

OMNIVISION

\*Equal contribution

Note that images displayed in the main paper have been enlarged for improved visibility. In the supplementary material, full-resolution images are presented. For video comparative results, please see [https://docs.google.com/document/d/1LVuaZY847m4z0QmAGIC691iZVgcUZkDbt\\_jXCj6Pz7Y/edit](https://docs.google.com/document/d/1LVuaZY847m4z0QmAGIC691iZVgcUZkDbt_jXCj6Pz7Y/edit).

## 7. Details of Datasets

In this section, we present the datasets used in this paper. The dataset details are summarized in Table 3.

Table 3. List of the datasets for evaluation. “RS” and “GS” denote “Rolling Shutter” and “Global Shutter”, respectively; “CFA” stands for “Color Filter Array”; “GT” means “Ground Truth”.

| Scene                                             | CIS setting   | EVS CFA    | GT      | Description                                                                                     |
|---------------------------------------------------|---------------|------------|---------|-------------------------------------------------------------------------------------------------|
| <b>Simulation data</b>                            |               |            |         |                                                                                                 |
| basketball                                        | RS, 120 FPS   | color      | 10 kFPS | Text and high frequency texture (ball skin) appearing and disappearing on a spinning basketball |
| checkerboard                                      | RS, 120 FPS   | color      | 10 kFPS | A free falling and rotating checkerboard with strong color contrast                             |
| slingshot egg                                     | RS, 120 FPS   | color      | 10 kFPS | A ultra-fast pellet flying toward an egg, large $V_{FE}$ delay                                  |
| running man                                       | RS, 120 FPS   | color      | 10 kFPS | A running man with slow speed, small $V_{FE}$ delay                                             |
| fan                                               | RS, 120 FPS   | color      | 10 kFPS | A rotating fan with fast speed rigid motion and small color contrast                            |
| <b>Measurement data - natural environments</b>    |               |            |         |                                                                                                 |
| mono drone                                        | RS, 121.8 FPS | monochrome | N.A.    | A still drone with rotating blades                                                              |
| color drone                                       | RS, 121.8 FPS | color      | N.A.    | A still drone with rotating blades                                                              |
| table tennis                                      | RS, 121.8 FPS | monochrome | N.A.    | Text appearing and disappearing on a spinning table tennis ball                                 |
| badminton                                         | RS, 121.8 FPS | color      | N.A.    | An upward-bouncing shuttlecock after falling                                                    |
| <b>Measurement data - controlled environments</b> |               |            |         |                                                                                                 |
| rotating disk                                     | RS, 121.8 FPS | monochrome | N.A.    | A rotating Siemens star under varying levels of illumination and speed                          |
| <b>HS-ERGB dataset</b>                            |               |            |         |                                                                                                 |
| spinning disk                                     | GS, 150 FPS   | monochrome | N.A.    | A plate undergoing out-of-plane rotation                                                        |
| spinning umbrella                                 | GS, 153 FPS   | monochrome | N.A.    | An umbrella with a regular pattern undergoing in-plane rotation                                 |

### 7.1. Simulation Data

The simulation data is generated by a CIS-EVS hybrid sensor simulator [4] which models EVS latency from both pixel front-end and peripheral readout circuitry. The simulator has been calibrated to mimic real sensor characteristics. Figure 12A illustrates the input and output of the simulator. The simulator processes a series of input images, which stem from high-speed camera captures at a frame rate of 10 kFPS. These input frames are also used as the ground truth for algorithm evaluation. The simulator outputs events at a resolution of  $540 \times 960$  as well as blurry 1080p CIS frames with RS effect. The simulator ensures that CIS and EVS data are synchronized temporally, in correspondence to the operation of a hybrid CIS-EVS sensor. The CIS RS row exposure time is set to 1 ms. The EVS contrast threshold and refractory time are configured to 20 % and 20  $\mu$ s, respectively.

## 7.2. Measurement Data

We use a hybrid CIS-EVS sensor [3] for data collection. Since we lack ground truth for measured video capture, only qualitative evaluation results are presented. Scenes from **natural environments** cover both indoor and outdoor sequences, as depicted in Figure 13A. The positive and negative triggering thresholds are configured to 23 % and 16 %, respectively.

In order to achieve a **controlled environment**, we establish an experimental setup with two adjustable LED light sources and a Siemens star pattern positioned on the motorized plate. We proposed five different ambient lighting conditions (50 lx, 100 lx, 300 lx, 500 lx, and 1000 lx) and five rotational speeds (76 rpm, 129 rpm, 182 rpm, 237 rpm, and 292 rpm) in our experimental setup. The positive and negative thresholds are set to 20 %.

## 7.3. HS-ERGB Dataset

The HS-ERGB dataset is captured by a dual camera setup [5]. As the CIS and EVS pixel coordinates are not well-aligned due to the configuration of stereo cameras, some of the pixels on the CIS sensor plane lack corresponding EVS data. The pixel-wise reconstruction methods suffer from this issue and generate frames with “holes”. To address this issue, we employ a post-processing methodology to yield “hole-free” event data. This method accumulates events in a single frame, followed by a morphological closing operation. The difference between the original accumulated frame and the closed-operated frame serves as the mask for identifying hole pixels. Subsequently, a median filter with a  $3 \times 3$  kernel is applied to the masked region to fill holes. Note that for machine learning-based methods (Time Lens, FILM, CBMNet, EvUnroll, and REFID), the post-processing method is not applied since the neighborhood relationship is intrinsically considered during the reconstruction of each pixel.

## 8. Parameter Settings

We use the following settings for sensor-related parameters:  $\tau_{0\text{up}} = 3.1 \times 10^{-5}$ ,  $\tau_{0\text{down}} = 3.2 \times 10^{-5}$ ,  $\alpha_{\text{up}} = 3.0 \times 10^{-16}$  and  $\alpha_{\text{down}} = 6.5 \times 10^{-16}$  (for positive and negative events) stem from design. The contrast threshold ranges from 16 % to 23 percent, and  $t_{\text{tp}} = 20 \mu\text{s}$  comes from hardware settings.

## 9. Additional Results

The optimization problem is non-linear, non-convex and there is no general theoretical guarantee of convergence. We empirically verified that we converge to reasonable accuracy as can be seen in our benchmark. The numerical optimization is performed using Trust Region Reflective algorithm [2]. We define lower and upper variable boundaries helping stability and use the refinement network to smooth unstable pixels.

Figure 12B illustrates the reconstructed image quality of the simulation dataset. The “basketball” and “slingshot egg” scenes are analyzed in the main paper. Regarding the checkerboard scene, our results exhibit the cleanest, sharpest, and straightest edges, while other methods suffer from varying degrees of ghosting and RS effects. Although EvUnroll demonstrates commendable effectiveness in rectifying rolling shutter distortions within the pattern, residual ghosting artifacts persist notably at the lower section of the checkerboard, which are also evident on the hand in the “basketball” dataset. In the “running man” dataset, our result demonstrates significantly fewer ghosting artifacts compared to EDI and AKF. In this slow-motion scenario, the  $V_{\text{FE}}$  delay is small, allowing the learning-based method to maximize its advantages. Our method achieves comparable results to the learning-based method.

Figure 13B illustrates the reconstructed image quality of natural scenes within the measured dataset. The proposed method successfully removes ghosting being more impactful to the overall visual experience. In the “mono drone” and “color drone” scenes, our advantage is limited due to slow object motion. The proposed method exhibits fewer ghosting artifacts on the rotating blade compared to EDI and AKF. Moreover, it achieves a notably sharper reconstruction of the upper-left blade pattern in the “mono drone” scene compared to CBMNet’s result. In the “table tennis” scene, our method and FILM demonstrate superior performance, while EDI and AKF suffer from pronounced ghosting. Additionally, Time Lens and CBMNet show some distortions in the alphabet characters. Regarding the “badminton” scene, our results present a higher fidelity in reconstructing the shuttlecock compared to FILM, and the racket compared to CBMNet, EvUnroll, and REFID.

Figure 14 presents reconstructed frames for controlled scenes of the measured dataset. In the “1000 lx, 237 rpm” scene, the results obtained from learning-based methods show either quantization errors or RS effects. In the “1000 lx, 292 rpm” scene, the reconstructed edges of spokes from learning-based methods begin to generate distortions, and the quality deteriorates as the radial distance increases. Conversely, our method maintains stable performance in these aspects.

Figure 15 displays comparative results for selected scenes in the HS-ERGB dataset. As explained in the main paper, our method does not yield optimal image quality, since it can be influenced by sensor characteristics, data quality (such as the

alignment of CIS and EVS), and object motion. Despite differing sensor characteristics from our model, these results show the excellent generalization capability of our method. Through the comprehensive comparative analysis, it is evident that these SOTA methodologies exhibit imperfections in at least one of the following categories: color noise, blur, or ghosting. In this study, we propose a novel approach that offers a favorable balance between these competing factors.

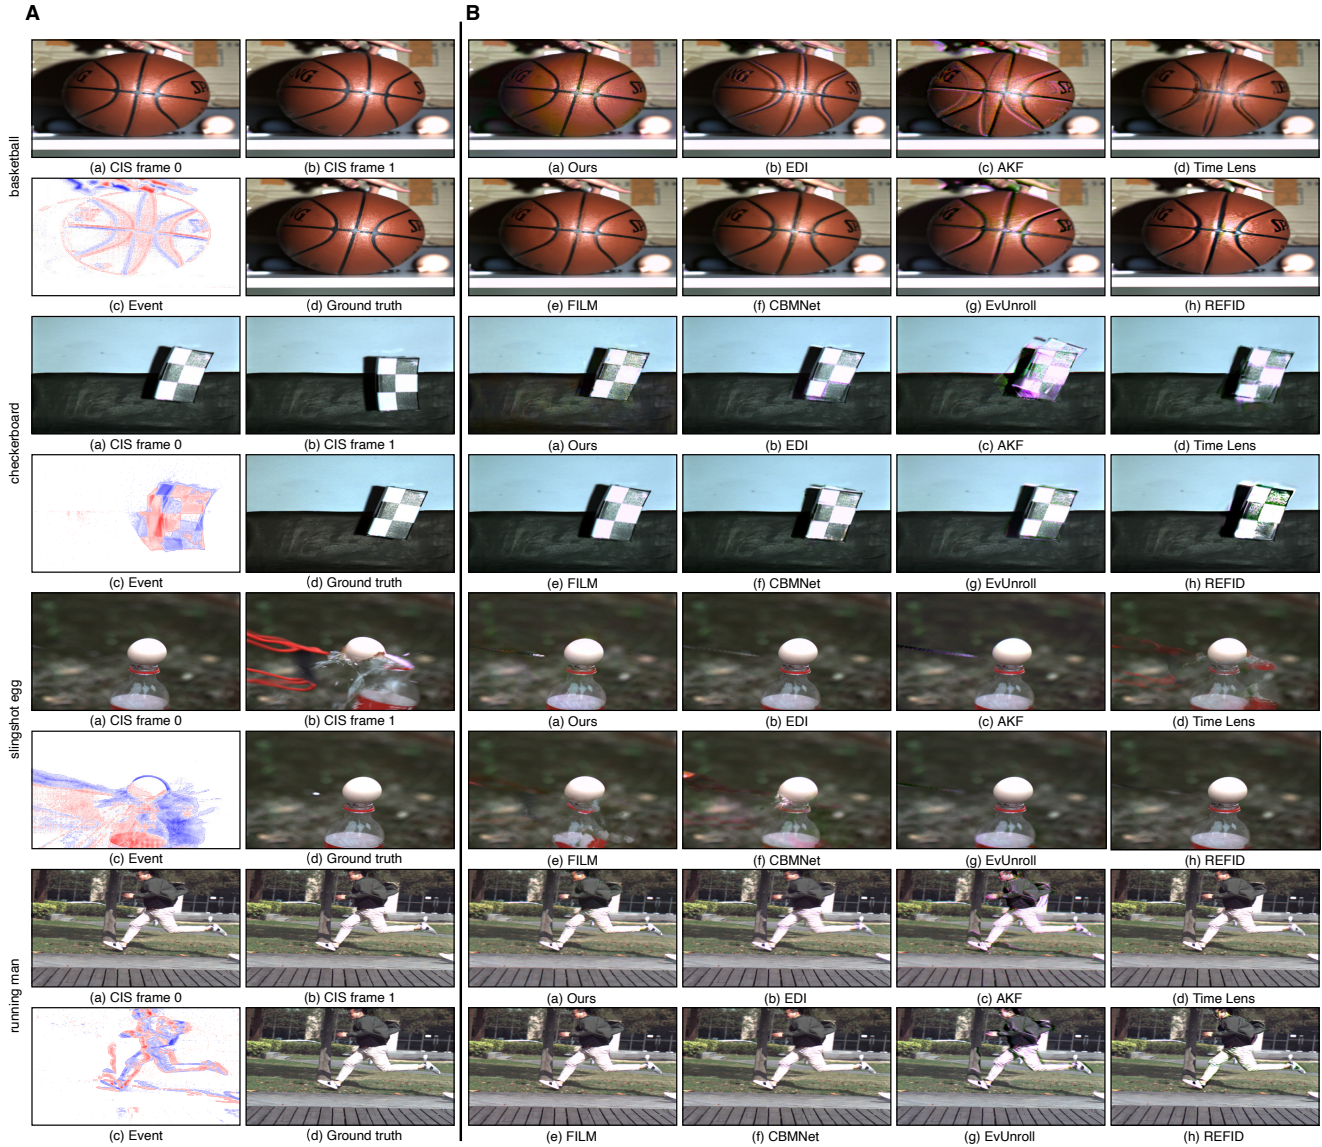

Figure 12. **A**: Visualization of simulation data. “CIS frame 0” and “CIS frame 1” are two consecutive simulated CIS frames that are generated from the simulator; “Event” shows the spatial distribution of generated events whose timestamps are between these two CIS frames (blue: positive events, red: negative events, color saturation: event count number); “Ground truth” shows high frame rate images that are used as the input of the simulator and the evaluation metric calculation. Both CIS frames and events are fed into our joint deblurring, rolling-shutter correction and video frame interpolation method. **B**: Qualitative results comparing the proposed method with EDI, AKF, Time Lens, FILM, CBMNet, EvUnroll, and REFID on the simulation dataset.



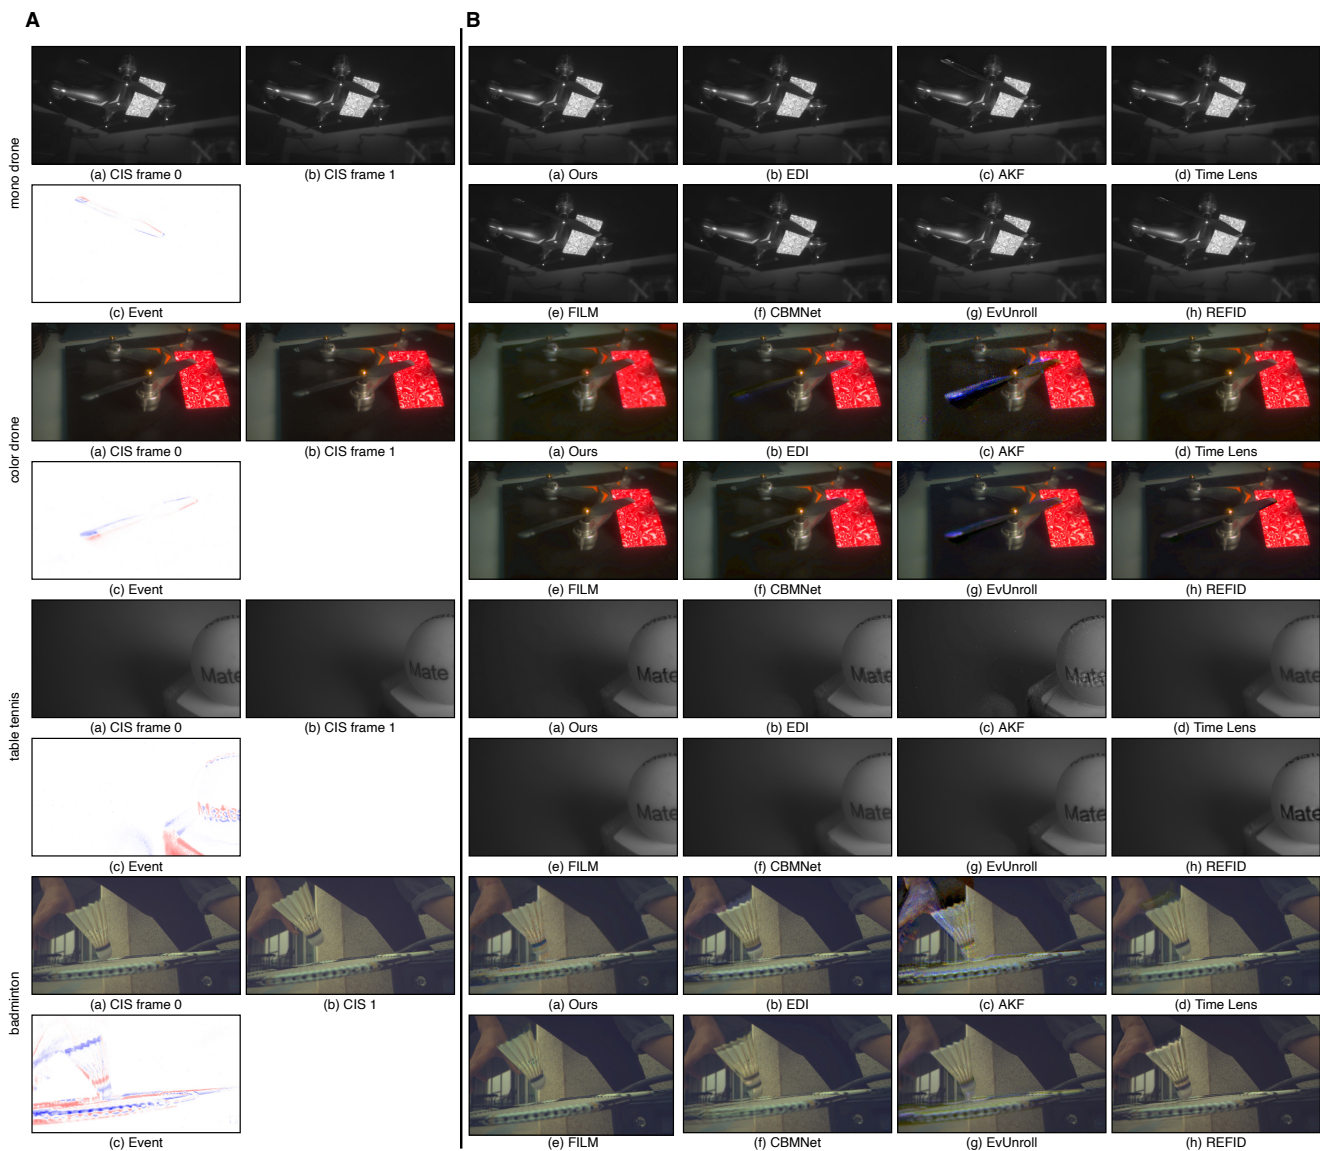

Figure 13. **A:** Visualization of measured data in the natural environment. “CIS frame 0” and “CIS frame 1” are two consecutive CIS frames that are captured by the hybrid sensor; “Event” shows the spatial distribution of collected events whose timestamps are between these two CIS frames (blue: positive events, red: negative events, color saturation: event count number). Both CIS frames and events are fed into our proposed method. GT is not available in the measurement dataset. **B:** Qualitative results comparing the proposed method with EDI, AKF, Time Lens, FILM, CBMNet, EvUnroll, and REFID on natural scenes from the measured datasets.



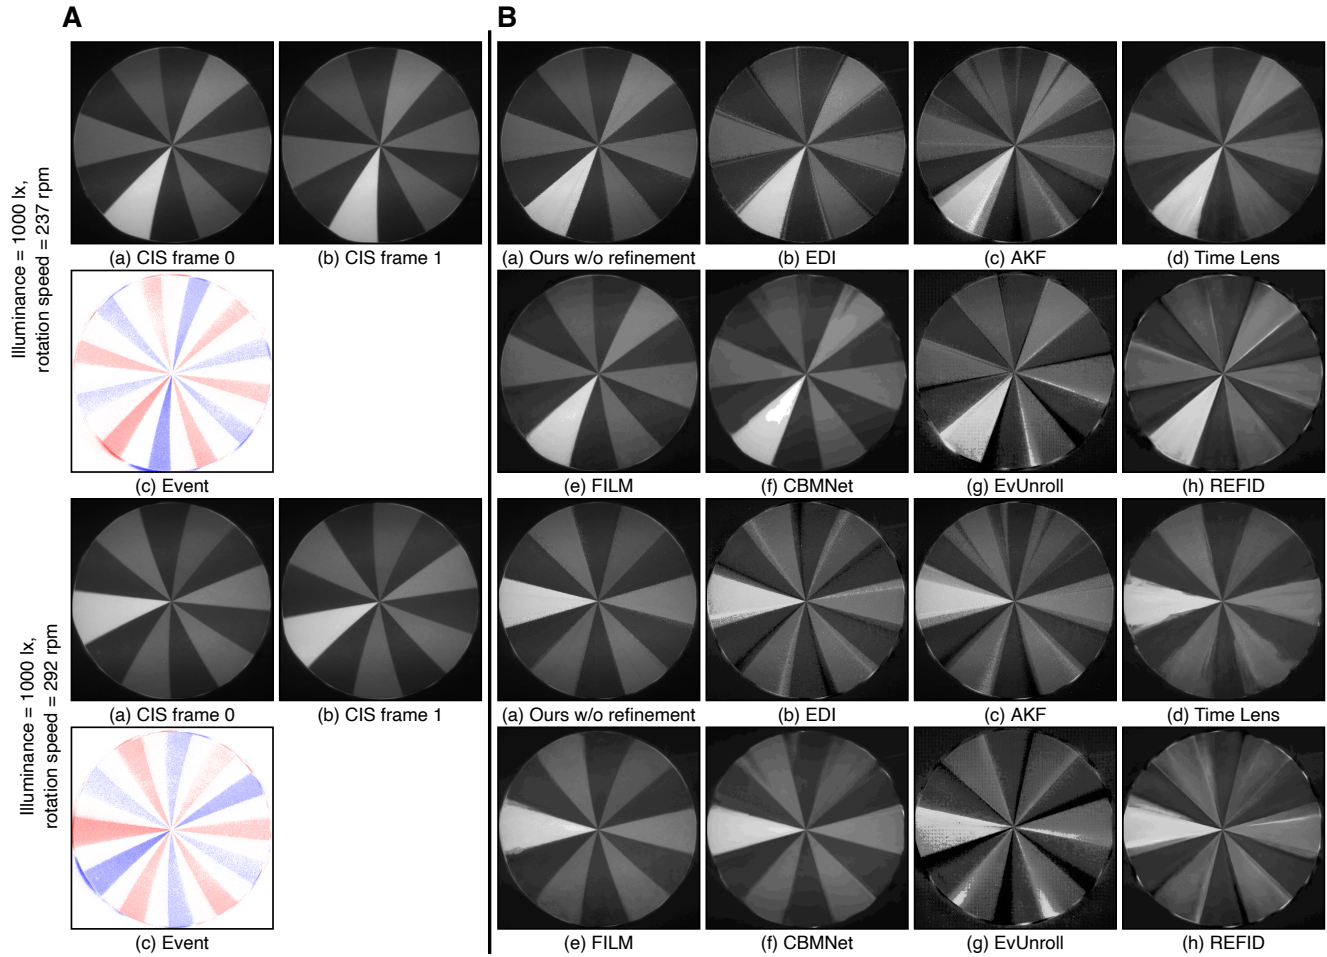

Figure 14. **A:** Visualization of measured data in the natural environment. “CIS frame 0” and “CIS frame 1” are two consecutive CIS frames that are captured by the hybrid sensor; “Event” shows the spatial distribution of collected events whose timestamps are between these two CIS frames (blue: positive events, red: negative events, color saturation: event count number). Both CIS frames and events are fed into our proposed method. GT is not available in the measurement dataset. **B:** Qualitative results comparing the proposed method with EDI, AKF, Time Lens, FILM, CBMNet, EvUnroll, and REFID on controlled scenes from the measured datasets.

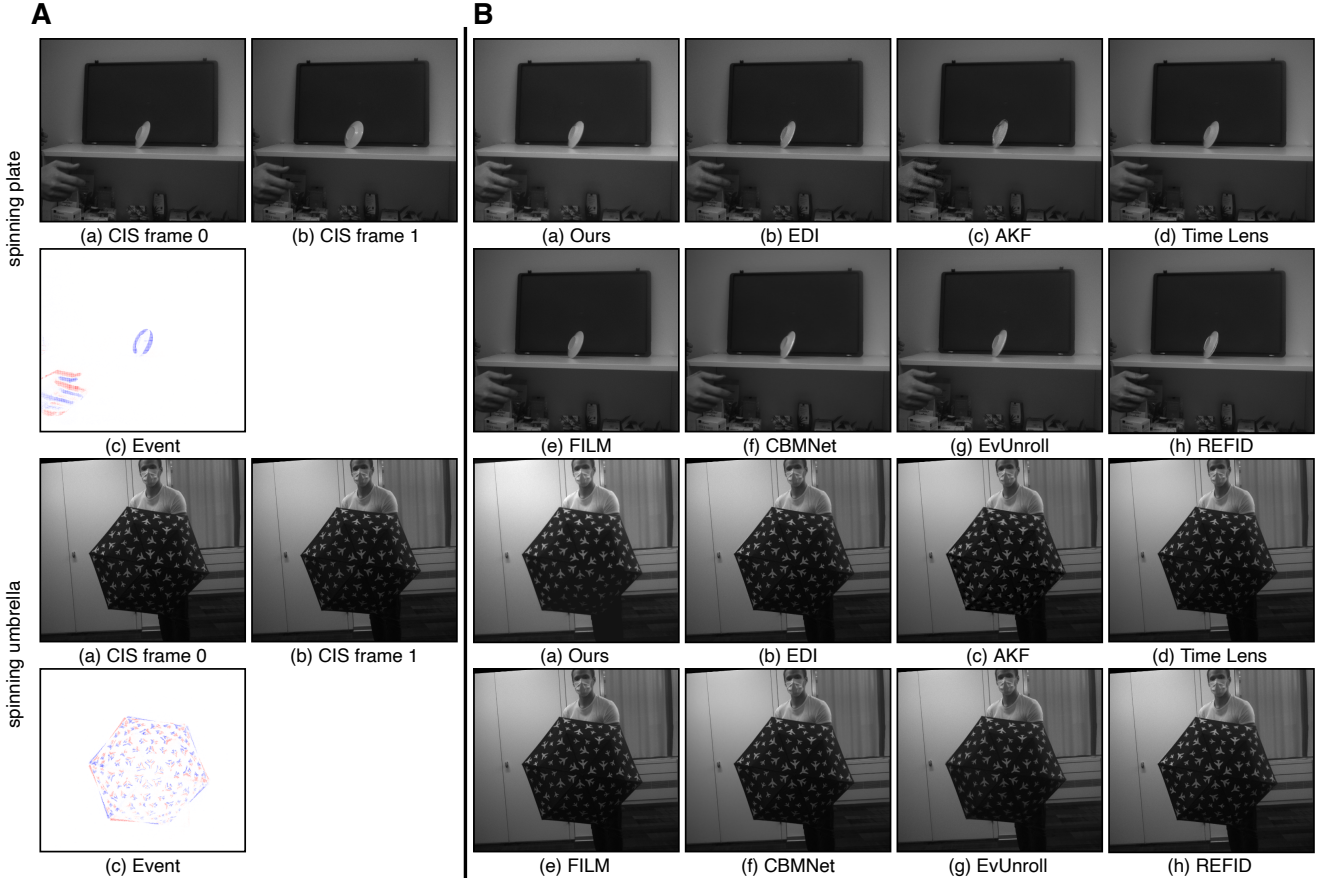

Figure 15. **A:** Visualization of measured data in the natural environment. “CIS frame 0” and “CIS frame 1” are two consecutive CIS frames that are captured by the hybrid sensor; “Event” shows the spatial distribution of collected events whose timestamps are between these two CIS frames (blue: positive events, red: negative events, color saturation: event count number). Both CIS frames and Events are fed into our proposed method. **B:** Qualitative results comparing the proposed method with EDI, AKF, Time Lens, FILM, CBMNet, EvUnroll, and REFID on selected scenes from the HS-ERGB dataset.

## 10. Additional Ablation Results

Figure 16 demonstrates the ablation results for the “slingshot egg” scene. In this particular scene, the pellet’s shape distinctly emerges upon implementing  $V_{FE}$  delay compensation. On the other hand, RL and RP compensation yield slight improvements on the pellet’s appearance. This observation suggests that  $V_{FE}$  plays a more significant role in this instance. Conversely, in the “basketball” scene displayed in the main paper, each module addresses specific aspects of ghosting. The ablation study shows that the efficacy of compensation is scene-dependent, and the proposed compensation methods are indispensable in improving reconstructed image quality.

Figure 17 and Table 4 present an ablation study against NAFNet [1] for deblurring on CIS images. Numerically, the proposed method achieves higher scores on most of the datasets. Visually it is apparent that for the basketball scene our method can reconstruct a more detailed texture on the basketball surface. NAFNet leads to patch artifacts near the image center. The artifacts are also noticeable in the checkerboard scene on black areas in both background and foreground. The study confirms that our method, with the assistance of EVS, exhibits excellent stability in deblurring task compared to NAFNet.

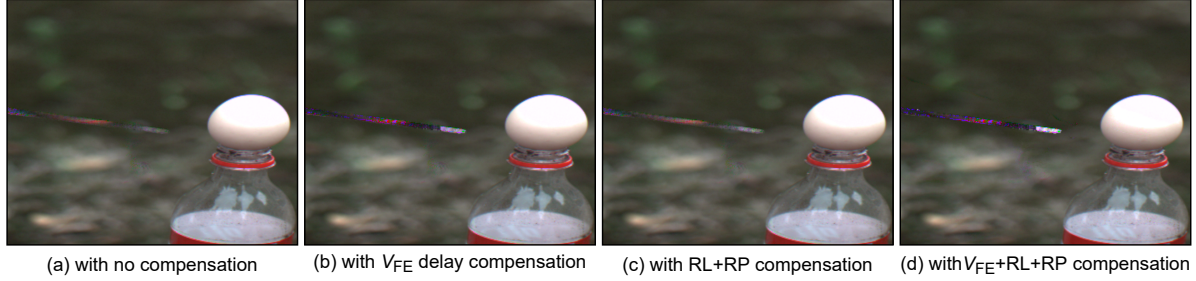

Figure 16. Qualitative results of ablation study on the “slingshot egg” scene. “RL” and “RP” denote “Readout Latency” and “Refractory Period”, respectively. Refer to Figure 1(a) for “with  $V_{FE}+RL+RP$  compensation and refinement” result.

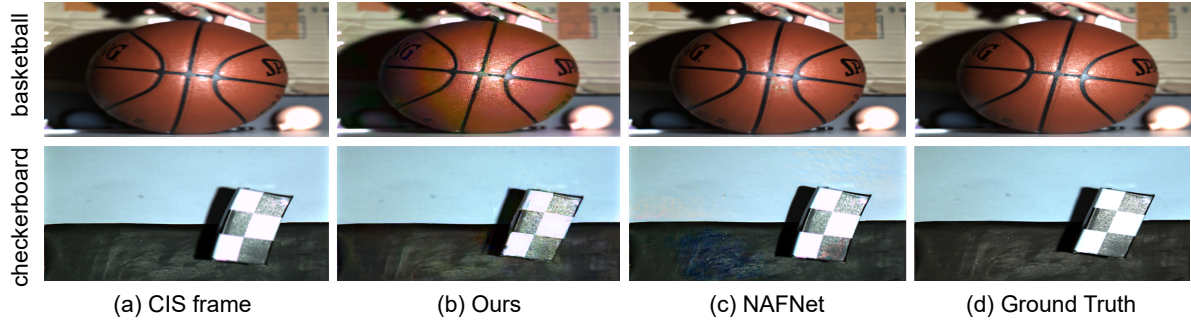

Figure 17. Qualitative comparative results of deblurring with NAFNet.

Table 4. Quantitative comparison of deblurring using original NAFNet [1] on the proposed simulation dataset for ablation study. Each row shows results for a particular scene. The first place is highlighted with **bold underline**.

| Scene          | Ours                |                     | NAFNet          |                     |
|----------------|---------------------|---------------------|-----------------|---------------------|
|                | PSNR $\uparrow$     | LPIPS $\downarrow$  | PSNR $\uparrow$ | LPIPS $\downarrow$  |
| basketball     | <b><u>27.41</u></b> | <b><u>0.152</u></b> | 25.09           | 0.258               |
| checkerboard   | <b><u>29.26</u></b> | <b><u>0.183</u></b> | 22.27           | 0.265               |
| slingshot egg  | <b><u>30.01</u></b> | <b><u>0.221</u></b> | 29.61           | 0.351               |
| running man    | <b><u>25.98</u></b> | 0.214               | 25.51           | <b><u>0.154</u></b> |
| fan            | <b><u>24.06</u></b> | 0.171               | 19.92           | <b><u>0.153</u></b> |
| <b>Average</b> | <b><u>27.34</u></b> | <b><u>0.188</u></b> | 24.48           | 0.236               |

## References

- [1] Liangyu Chen, Xiaojie Chu, Xiangyu Zhang, and Jian Sun. Simple baselines for image restoration. *arXiv preprint arXiv:2204.04676*, 2022. **6, 7**
- [2] MA Branch et al. A subspace, interior, and conjugate gradient method for large-scale bound-constrained minimization problems. *SIAM Journal on Scientific Computing*, 1999. **2**
- [3] Menghan Guo, Shoushun Chen, Zhe Gao, Wenlei Yang, Peter Bartkovjak, Qing Qin, Xiaoqin Hu, Dahai Zhou, Qiping Huang, Masayuki Uchiyama, Yoshiharu Kudo, Shimpei Fukuoka, Chengcheng Xu, Hiroaki Ebihara, Xueqing Wang, Peiwen Jiang, Bo Jiang, Bo Mu, Huan Chen, Jason Yang, T. J. Dai, and Andreas Suess. A Three-Wafer-Stacked Hybrid 15-MPixel CIS + 1-MPixel EVS With 4.6-GEvent/s Readout, In-Pixel TDC, and On-Chip ISP and ESP Function. *IEEE Journal of Solid-State Circuits*, pages 1–10, 2023. **2**
- [4] Xiaozheng Mou, Kaijun Feng, Alex Yi, Steve Wang, Huan Chen, Xiaoqin Hu, Menghan Guo, Shoushun Chen, and Andreas Suess. Accurate event simulation using high-speed video. *Electronic Imaging*, 34(7):242–1–242–6, Jan. 2022. **1**
- [5] Stepan Tulyakov, Daniel Gehrig, Stamatios Georgoulis, Julius Erbach, Mathias Gehrig, Yuanyou Li, and Davide Scaramuzza. Time Lens: Event-based Video Frame Interpolation. In *2021 IEEE/CVF Conference on Computer Vision and Pattern Recognition (CVPR)*, pages 16150–16159, Nashville, TN, USA, June 2021. IEEE. **2**
